# Supplementary material for: Rapid hydrolysis of phosphate ester promoted by Ce(iv) conjugating with a β-cyclodextrin monomer and dimer
Source: Royal Society of Chemistry journal article supplement (doi:10.1039/c2dt00003b), 2012-01-01
Supplement: c2dt00003b.pdf [file c2dt00003b.pdf]

# Electronic Supporting Information

## Rapid hydrolysis of phosphate diester promoted by Ce(IV) conjugating with $\beta$ -cyclodextrin monomer and dimer

Meng Zhao, Cong Zhao, Xue-Qin Jiang, Liang-Nian Ji and Zong-Wan Mao\*

MOE Key Laboratory of Bioinorganic and Synthetic Chemistry,  
School of Chemistry and Chemical Engineering,  
Sun Yat-Sen University, Guangzhou 510275, China  
Fax: +86-20-84112245; Tel: +86-20-84113788;  
E-mail: cesmzw@mail.sysu.edu.cn

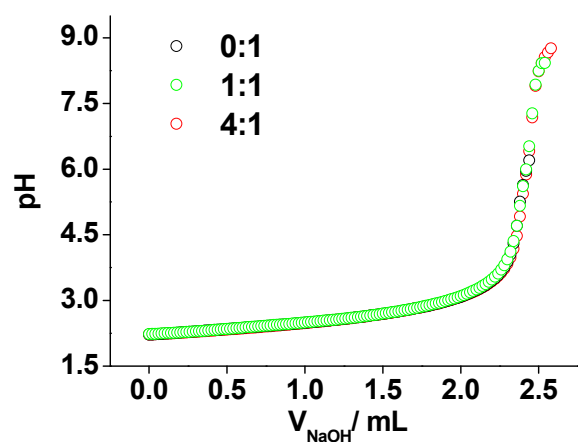

Fig. S1 Titration curves of 1 mM  $\text{Ce}(\text{NH}_4)_2(\text{NO}_3)_6$  by NaOH in aqueous solution ( $I = 0.1 \text{ M NaNO}_3$ ) at  $298 \pm 0.1 \text{ K}$ . Conditions: black,  $[\beta\text{CD}]:[\text{Ce}(\text{IV})] = 0:1$ ; green,  $[\beta\text{CD}]:[\text{Ce}(\text{IV})] = 1:1$ ; red,  $[\beta\text{CD}]:[\text{Ce}(\text{IV})] = 4:1$ .

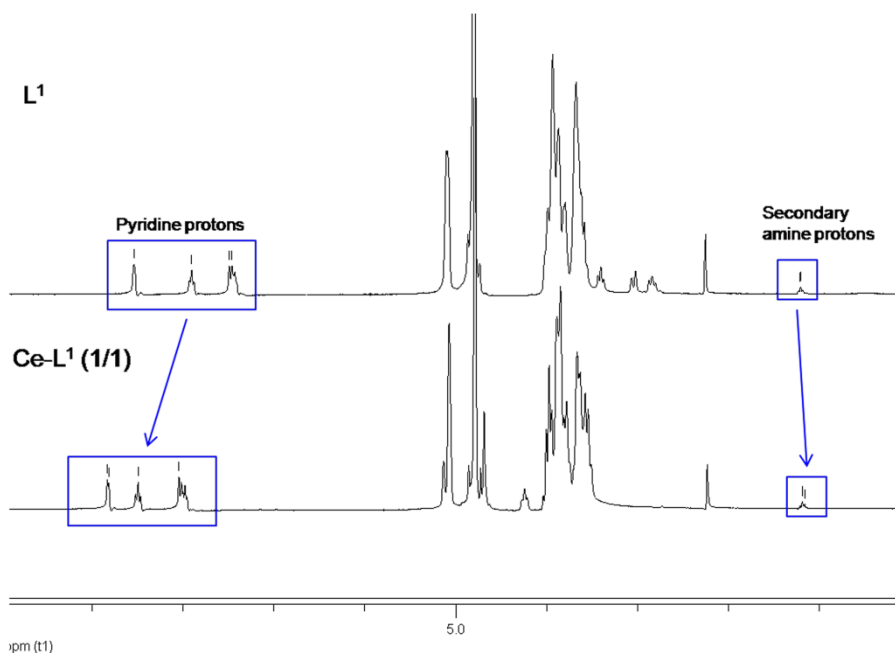

Fig. S2  $^1\text{H}$  NMR spectra of  $\text{L}^1$  (upper) and  $\text{Ce}(\text{IV})\text{-L}^1$  (bottom) in  $\text{D}_2\text{O}$ .

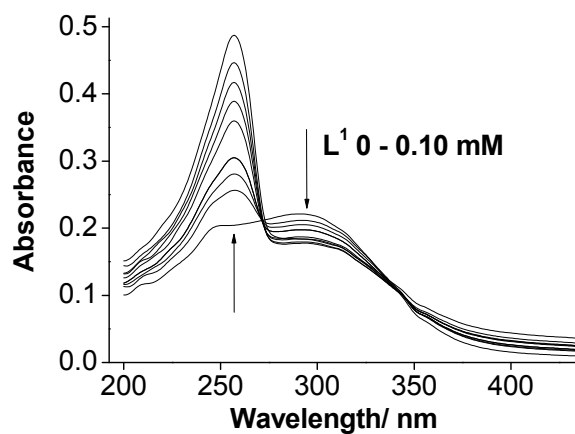

Fig. S3 UV-vis spectra of 0.06 mM  $\text{Ce}(\text{NH}_4)_2(\text{NO}_3)_6$  at increasing concentrations of  $\text{L}^1$  from 0 to 0.10 mM at  $298 \pm 0.1\text{K}$ .

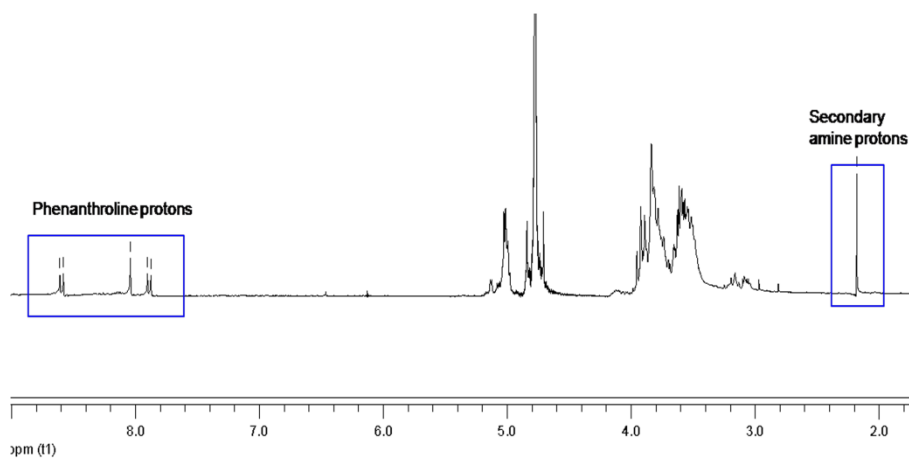

Fig. S4 <sup>1</sup>H NMR spectrum of  $\text{Ce}(\text{IV})\text{-L}^2$  (ratio 1:1) in  $\text{D}_2\text{O}$ .

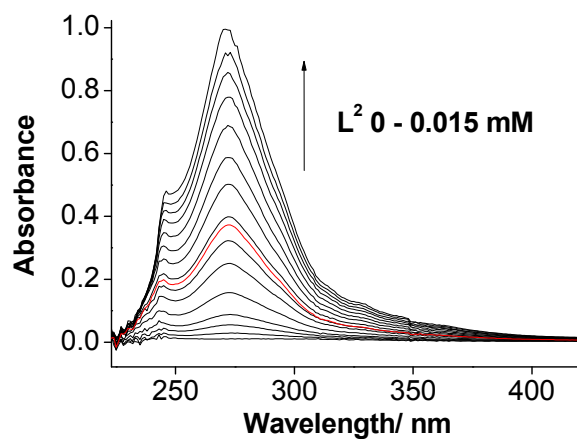

Fig. S5 UV-vis spectra at  $298 \pm 0.1\text{K}$  of  $2.5\ \mu\text{M}\ \text{Ce}(\text{NH}_4)_2(\text{NO}_3)_6$  at increasing concentrations of  $\text{L}^2$  from 0 to 0.015 mM (black lines); the red line represents the free  $\text{L}^2$  at 0.015 mM. Enhanced absorption observed for  $\text{Ce}(\text{IV})\text{-L}^2$  compared with free  $\text{L}^2$  approved coordination between  $\text{L}^2$  and  $\text{Ce}(\text{IV})$  ion.

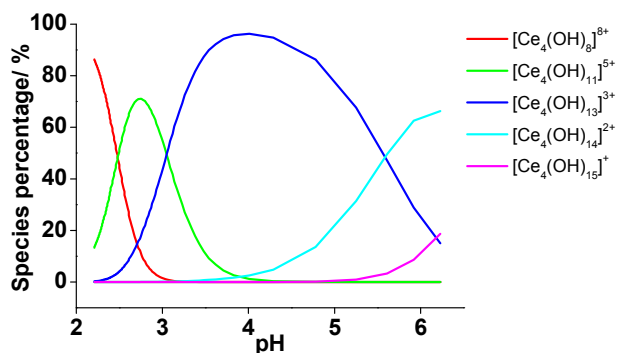

Fig. S6 Species distribution of 1.0 mM  $\text{Ce}(\text{NH}_4)_2(\text{NO}_3)_6$  in aqueous solution at 0.1 M  $\text{NaNO}_3$  and  $298 \pm 0.1$  K.

Table S1 Thermodynamic parameters for species of  $\text{Ce}(\text{NH}_4)_2(\text{NO}_3)_6$  in solution at  $298 \pm 0.1$  K with estimated errors in parentheses.

| Species formula                      | $\text{Log } \beta$ | $\text{p}K_a$ |
|--------------------------------------|---------------------|---------------|
| $\text{OH}^-$                        | -13.80              | -             |
| $[\text{Ce}_4(\text{OH})_8]^{8+}$    | 20.29(1)            | -             |
| $[\text{Ce}_4(\text{OH})_{11}]^{5+}$ | 12.85(1)            | -             |
| $[\text{Ce}_4(\text{OH})_{13}]^{3+}$ | 6.75(1)             | -             |
| $[\text{Ce}_4(\text{OH})_{14}]^{2+}$ | 1.17(1)             | 5.58          |
| $[\text{Ce}_4(\text{OH})_{15}]^+$    | -5.62(1)            | 6.79          |

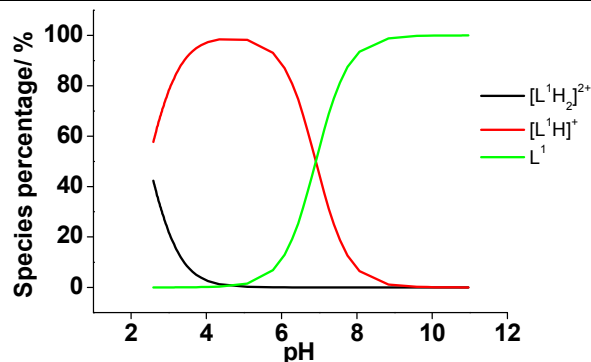

Fig. S7 Species distributions of 1.0 mM  $\text{L}^1$  in aqueous solutions at 0.1 M  $\text{NaNO}_3$  and  $298 \pm 0.1$  K.

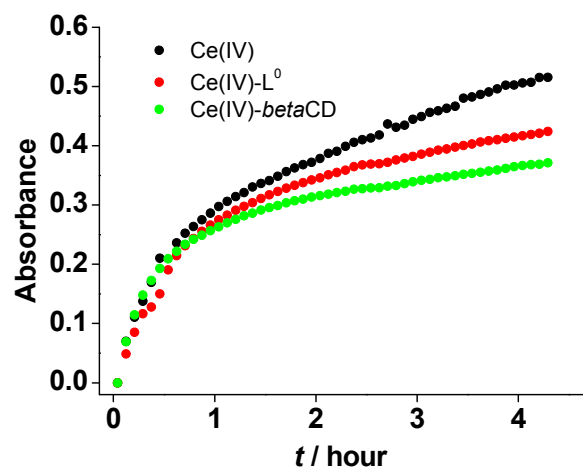

Fig. S8 BNNP (0.01 mM) hydrolysis at pH 7.2 (50 mM HEPES,  $I = 0.1$  M  $\text{NaNO}_3$ ) and  $308 \pm 0.1$  K. Conditions: black,  $[\text{Ce}(\text{IV})] = 0.1$  mM; red,  $[\text{Ce}(\text{IV})] = 0.1$  mM,  $[\text{L}^0] = 0.1$  mM; green,  $[\text{Ce}(\text{IV})] = 0.1$  mM,  $[\beta\text{CD}] = 0.1$  mM.

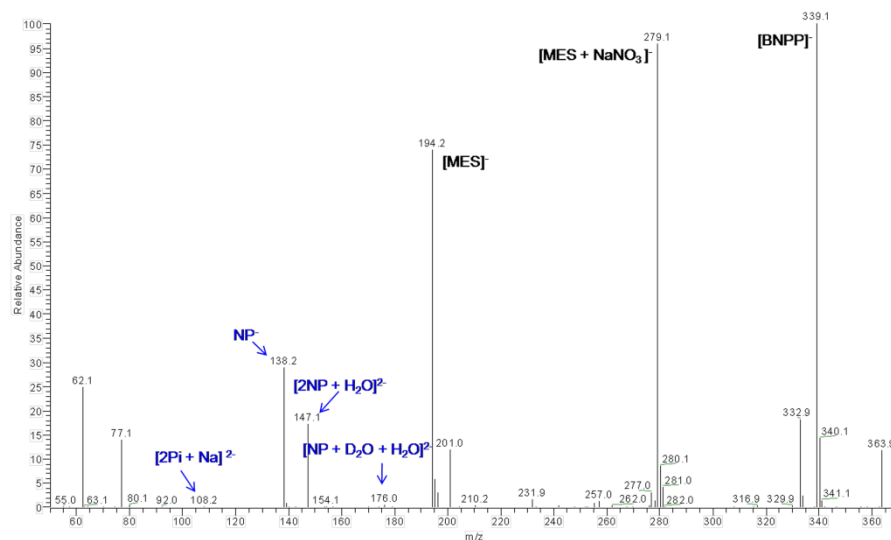

**Fig. S9** Negative charge ESI MS analysis of the BNPP hydrolysis products. Conditions: [Ce(IV)] = 0.5 mM, [L<sup>1</sup>] = 2.0 mM, [BNPP] = 1.0 mM, 10% D<sub>2</sub>O solution buffered at pH 6.5 (50 mM MES, I = 0.1 M NaNO<sub>3</sub>).

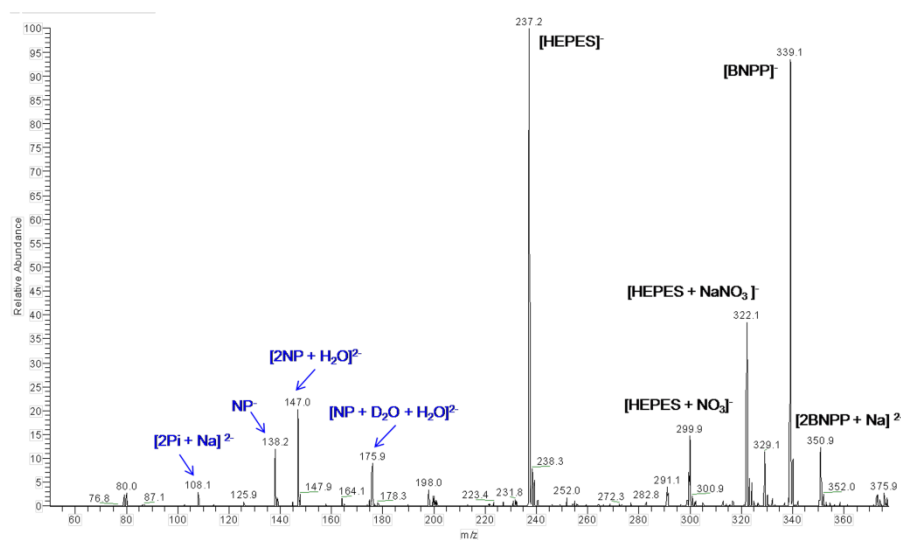

**Fig. S10** Negative charge ESI MS analysis of the BNPP hydrolysis products. Conditions: [Ce(IV)] = 0.5 mM, [L<sup>2</sup>] = 2.0 mM, [BNPP] = 1.0 mM, 10% D<sub>2</sub>O solution buffered at pH 7.2 (50 mM HEPES, I = 0.1 M NaNO<sub>3</sub>).

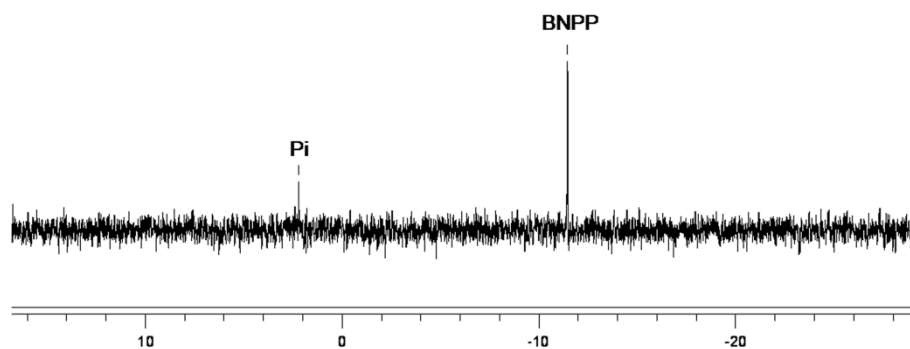

**Fig. S11** <sup>31</sup>P NMR analysis of BNPP hydrolysis product catalyzed by Ce-L<sup>2</sup> in 10% D<sub>2</sub>O solution at 308 ± 0.1K: [Ce(IV)] = 0.5 mM, [L<sup>2</sup>] = 2.0 mM, [BNPP] = 1.0 mM, [HEPES buffer] = 50 mM and I = 0.1 M NaNO<sub>3</sub>. Similar result was obtained for Ce-L<sup>1</sup>
